# Supplementary material
Source: Springer Nature journal article supplement (https://www.springerprofessional.de/resource/supplementary/13638_2014_963_MOESM9_ESM.pdf/11898886)

# Average Delay

Average delay(sec)

■ Message delivery based reputation system

■ Acknowledgement system

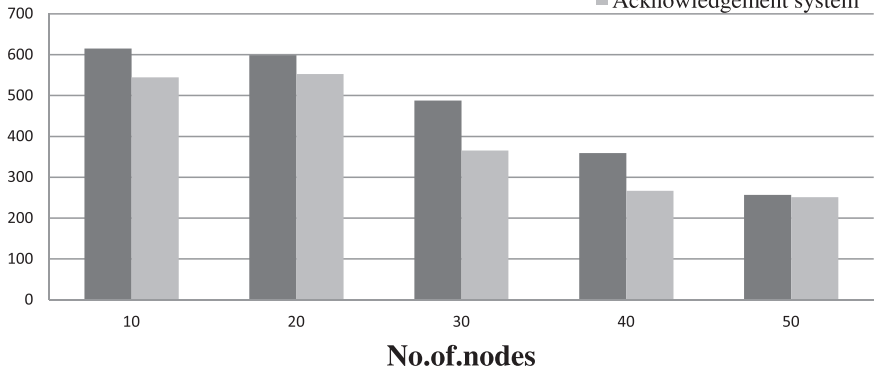

Supplement: MOESM9 [file 11898886]
